# Supplementary material
Source: MDPI journal article supplement (https://www.mdpi.com/2075-163X/11/4/351)
Supplement: s1 [file s1]

## SUPPLEMENTARY MATERIALS

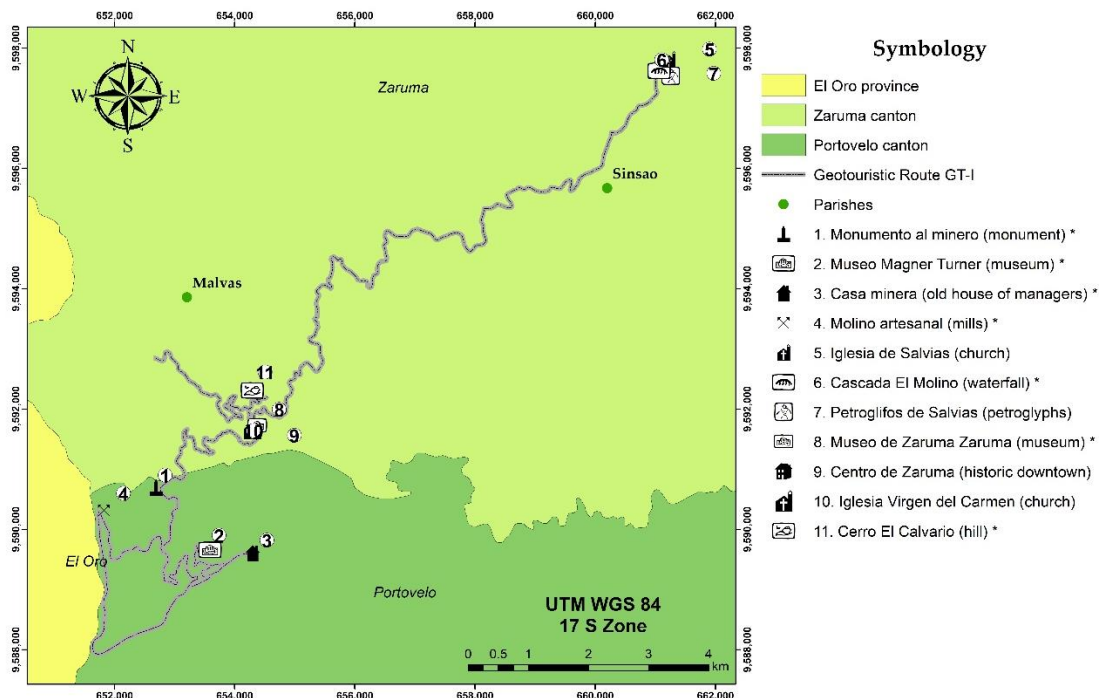

**Figure S1.** Geotouristic Route GT-I: Portovelo-Salvias-Zaruma Circuit. \* Geosites / mining sites. Based on [60].

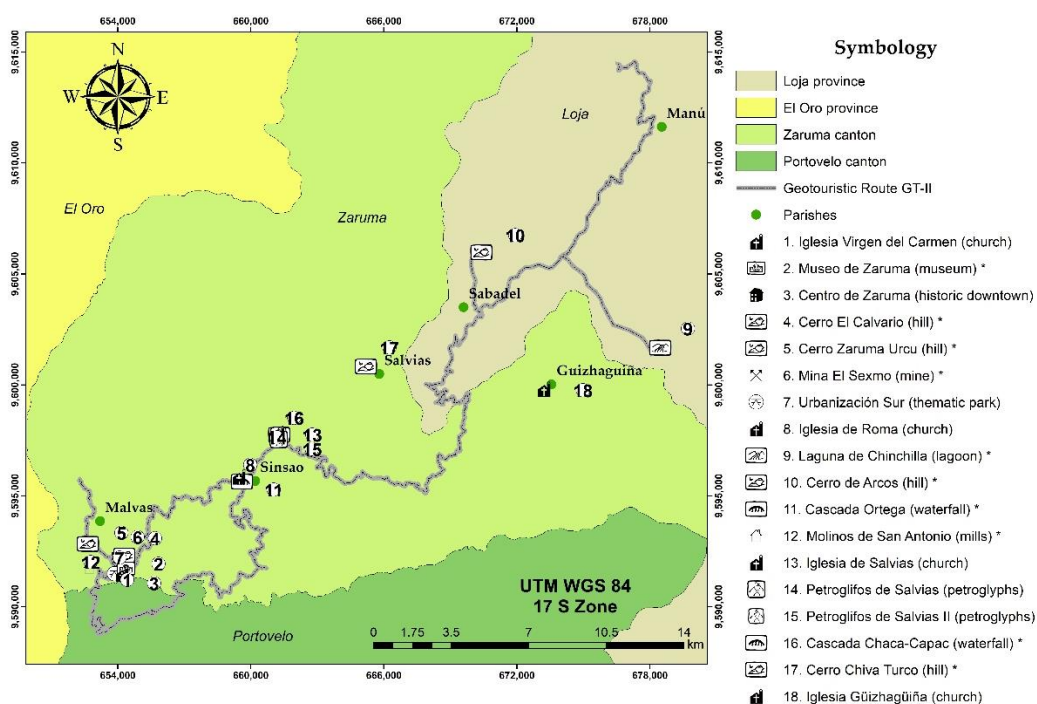

**Figure S2.** Geotouristic Route GT-II: Thematic map "In search of an adventure". \* Geosites / mining sites. Based on [61].

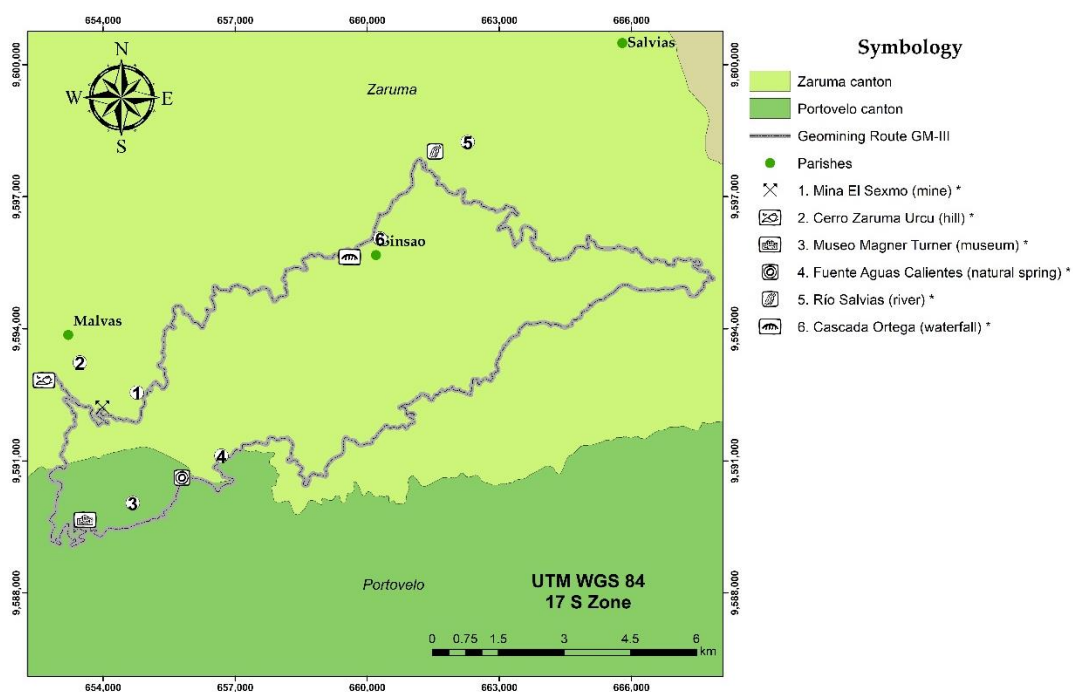

**Figure S3.** Ruta Geomínera GM-III: Suggested itinerary, within “Ruta del Oro”, selecting several geosites and mining sites. \* Geosites / mining sites. Based on [34].
